# Supplementary material for: Intercellular communication induces glycolytic synchronization waves between individually oscillating cells
Source: PubMed Central journal article supplement — Proc Natl Acad Sci U S A. 2021 Feb 1;118(6):e2010075118. doi: 10.1073/pnas.2010075118 (PMC8017953; doi:10.1073/pnas.2010075118), 2021-02-01
Supplement: pnas.2010075118.sapp.pdf [file pnas.2010075118.sapp.pdf]

1

## 2 **Supplementary Information for**

### 3 **Inter-cellular communication induces glycolytic synchronization waves between individually** 4 **oscillating cells**

5 **Martin Mojica-Benavides, David D. van Niekerk, Mite Mijalkov, Jacky L. Snoep, Bernhard Mehlig, Giovanni Volpe,**  
6 **Mattias Goksör, and Caroline B. Adiels.**

7 **Caroline B. Adiels.**

8 **E-mail: [caroline.adiels@physics.gu.se](mailto:caroline.adiels@physics.gu.se)**

#### 9 **This PDF file includes:**

10 Figs. S1 to S10

11 Legends for Movies S1 to S4

#### 12 **Other supplementary materials for this manuscript include the following:**

13 Movies S1 to S4

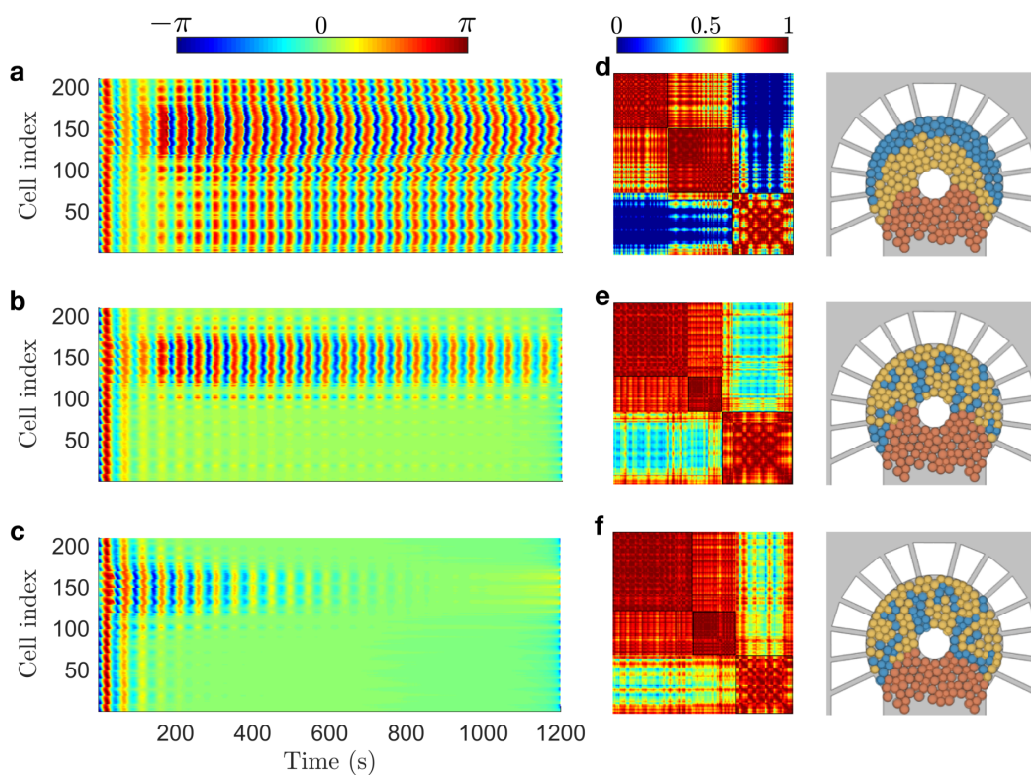

**Fig. S1.** The kinetic model for single cells predicts the formation of synchronization communities. The 210 simulated cells using the Gustavsson model under the boundary conditions that resembled the experiments, display coupled oscillatory behaviour in the metabolites present through the individual glycolytic pathways. For the  $\text{CN}^-$  concentrations in the stress solution of (a) 20 mM, (b) 24 mM and (c) 28 mM, NADH instantaneous phases (from  $-\pi$  to  $\pi$ ) showed the most distinguishable cases of synchronization distribution across the cell array. (d)- (f) The weighted matrices with Pearson correlation coefficients from 0 to 1 underline the synchronization communities, that emerge shaped by the diffusion gradients from the geometrical conditions. In contrast with the experimental results, a steady state was achieved more homogeneously as cells were exposed to the higher  $\text{CN}^-$  concentrations, resulting into new non-oscillating communities. Community colors are assigned randomly.

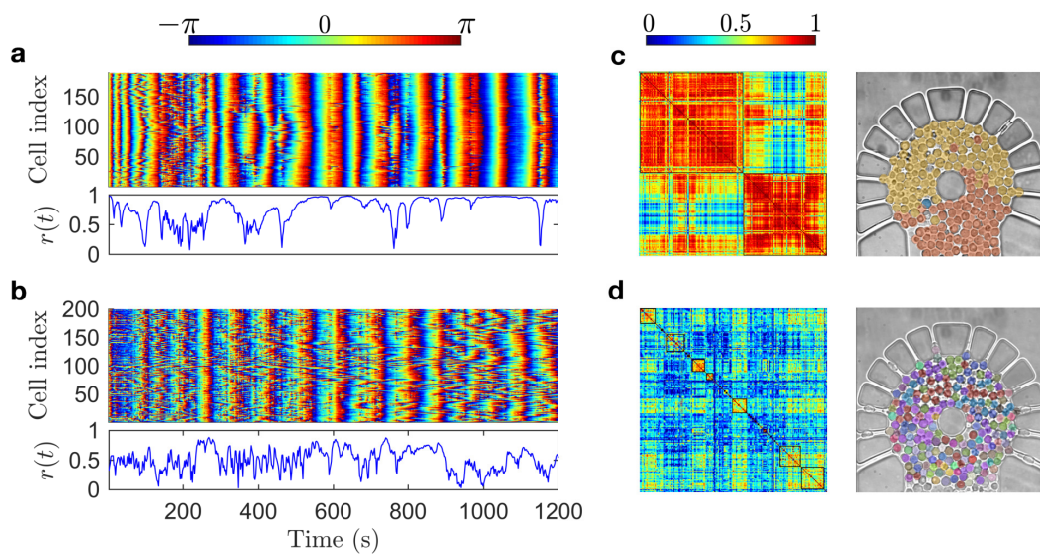

**Fig. S2.** Synchronization analysis and community structure for the experimental cases of 8 mM and 24 mM of  $\text{CN}^-$ . (a) For concentrations sufficiently low, glycolytic oscillations are less sustained. Despite the fact that the order parameter  $r$  can show higher values, oscillations not necessarily correspond to the glycolytic cycle. (b) Significantly high concentrations of  $\text{CN}^-$  induce uncorrelated behaviour among the cells as can be noticed from the low values of the order parameter  $r$ . (c-d) Present the community structures for these two extreme experimental cases, where the 8 mM case reveal larger communities due to the high presence of secreted ACA. On the other hand in the 24 mM case, a higher amount of ACA is consumed by the binding with  $\text{CN}^-$  resulting in an undefined community structure. Community colors are assigned randomly.

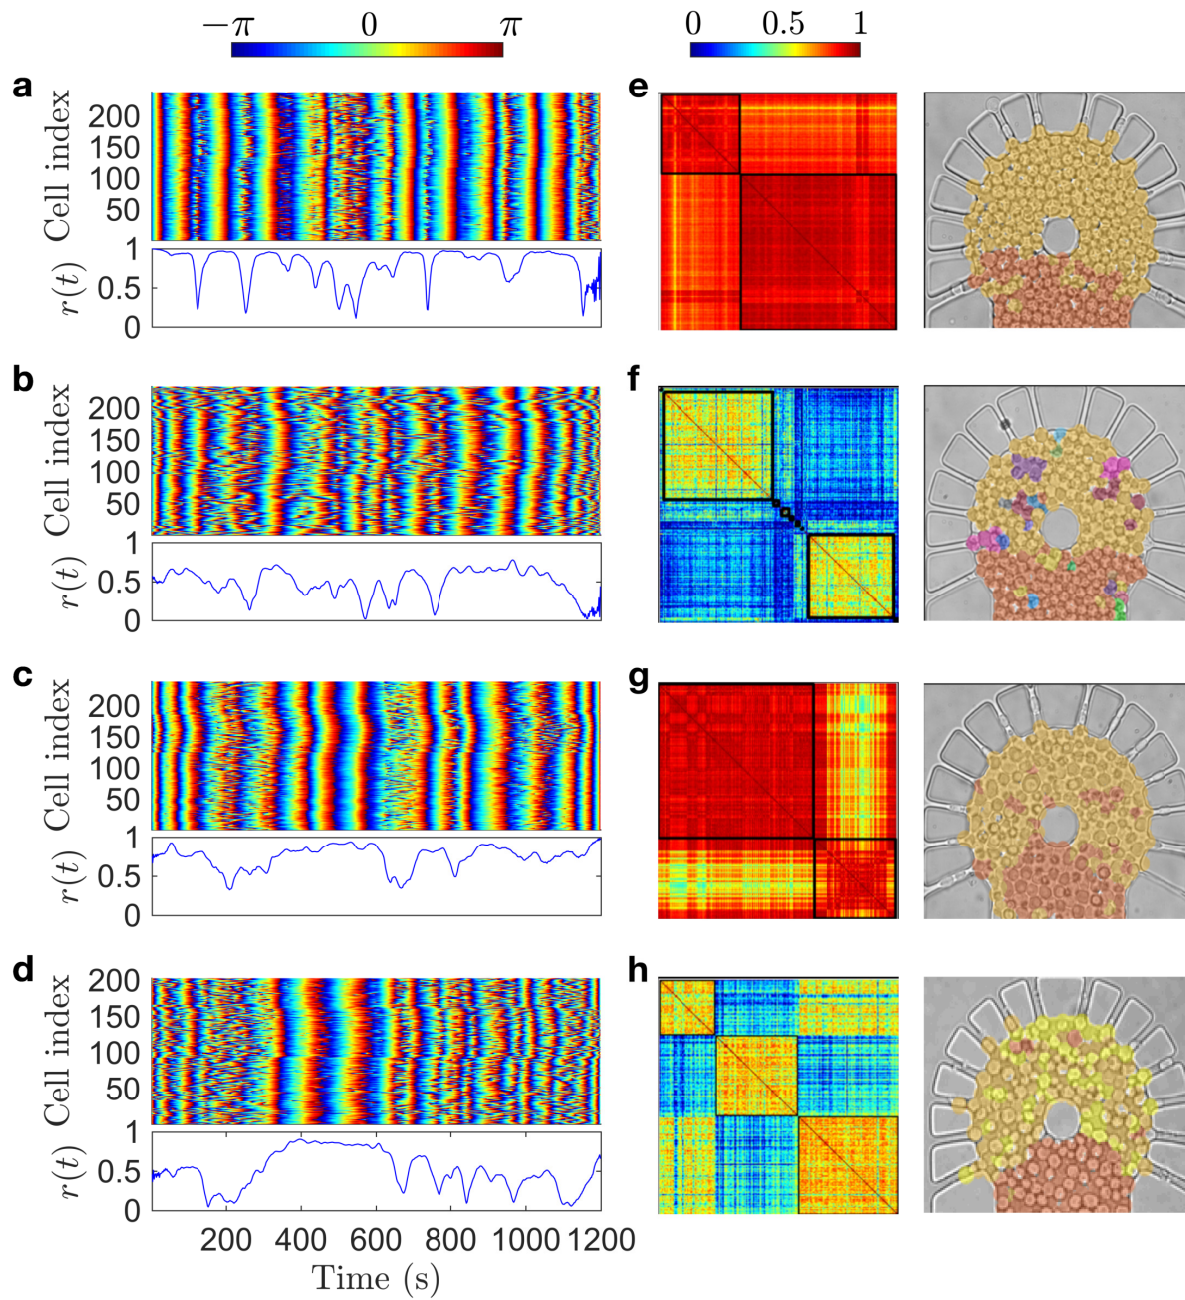

Fig. S3. Community structure repetitions for the 8 mM case.

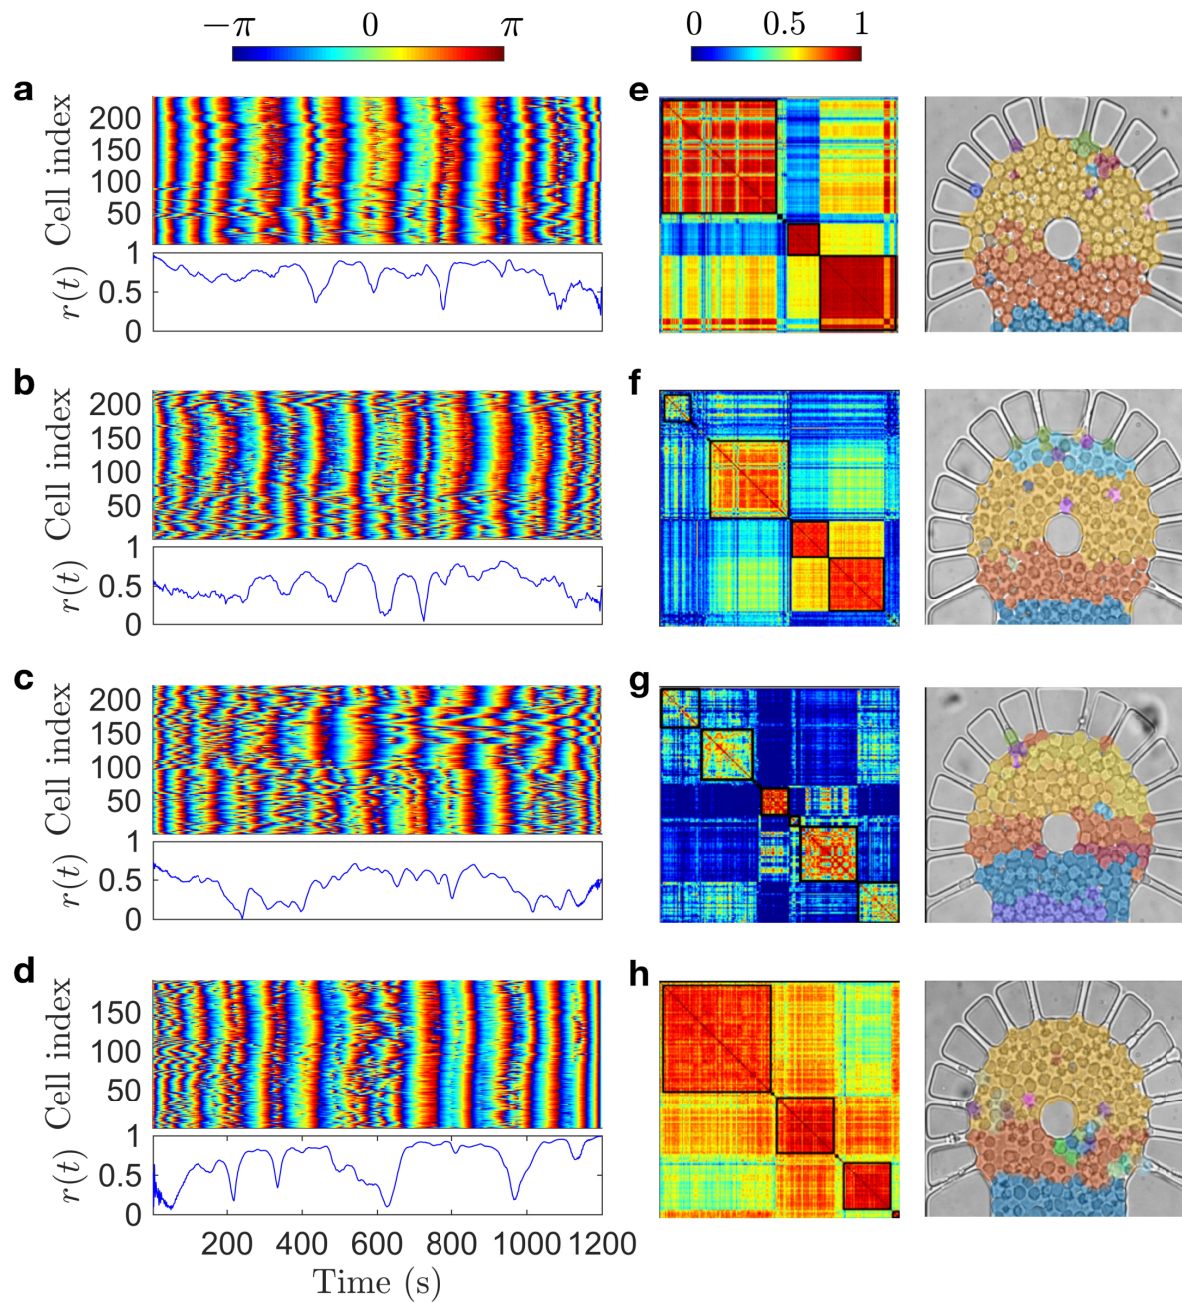

Fig. S4. Community structure repetitions for the 12 mM case.

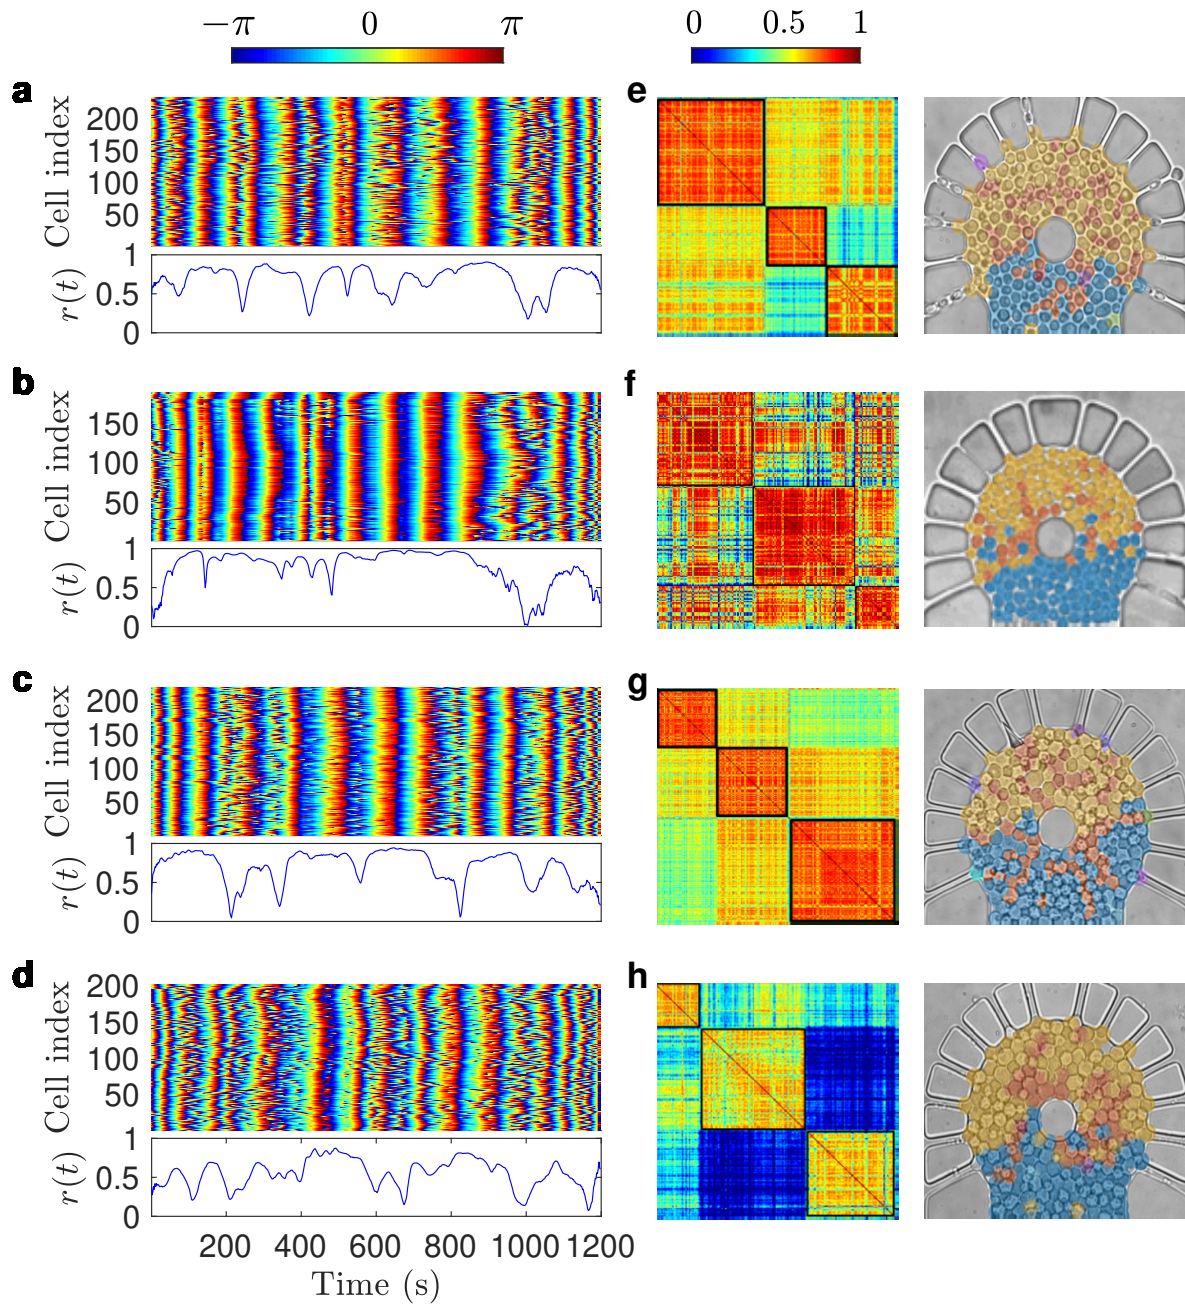

Fig. S5. Repetitions for the 16 mM case.

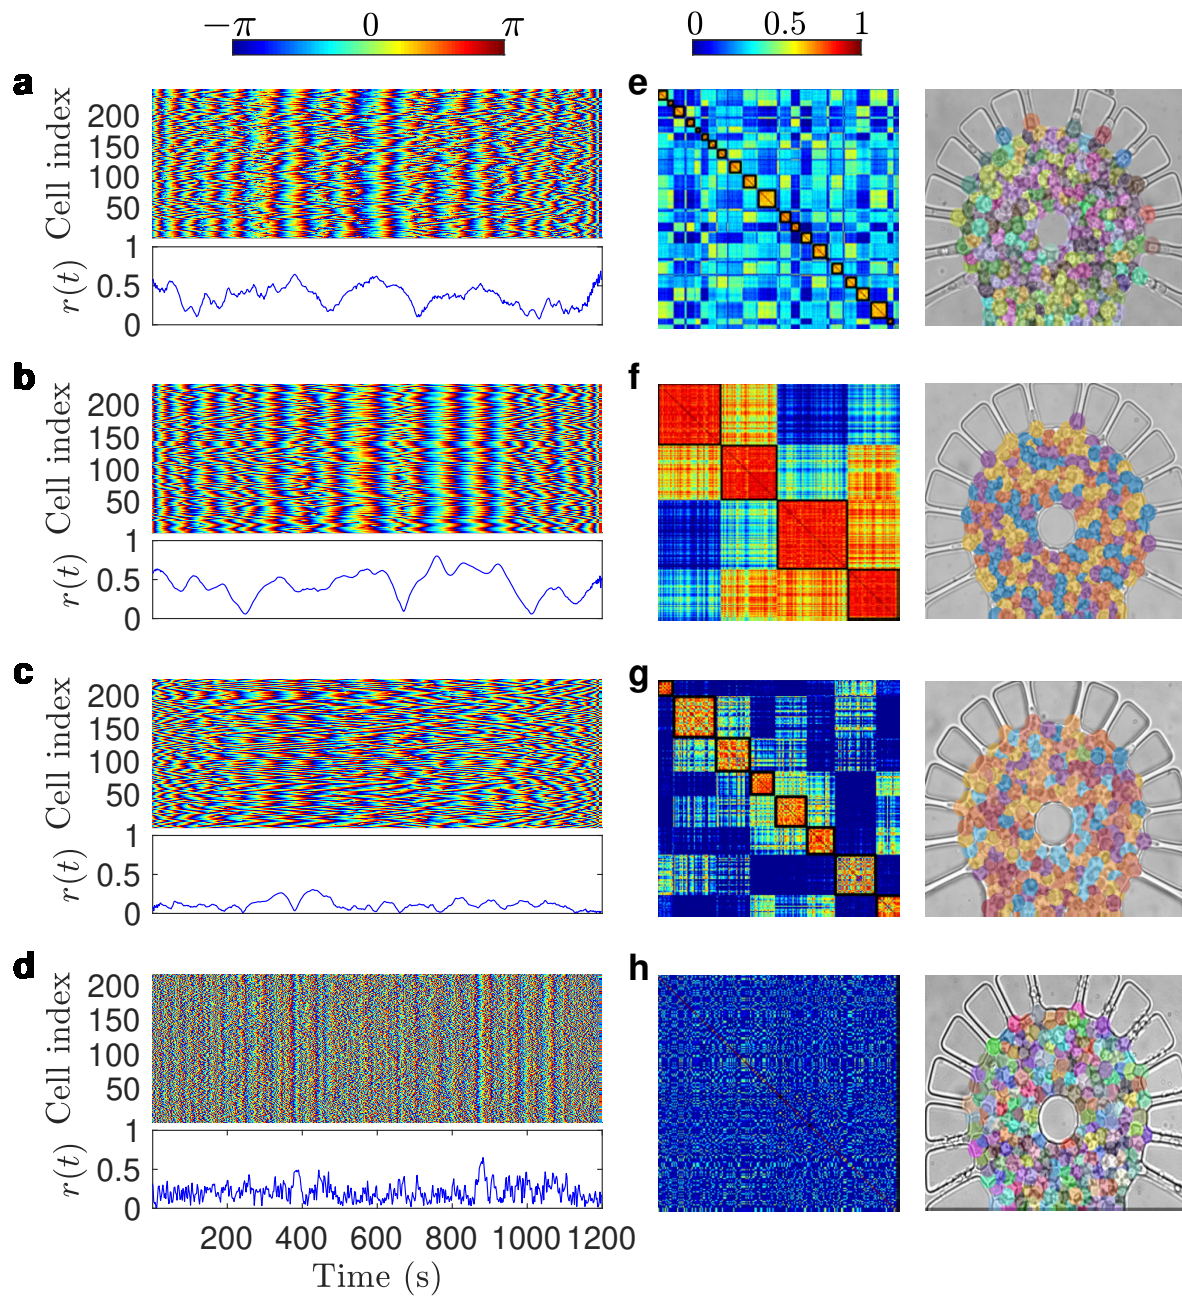

Fig. S6. Community structure evolutions for the 20 mM case.

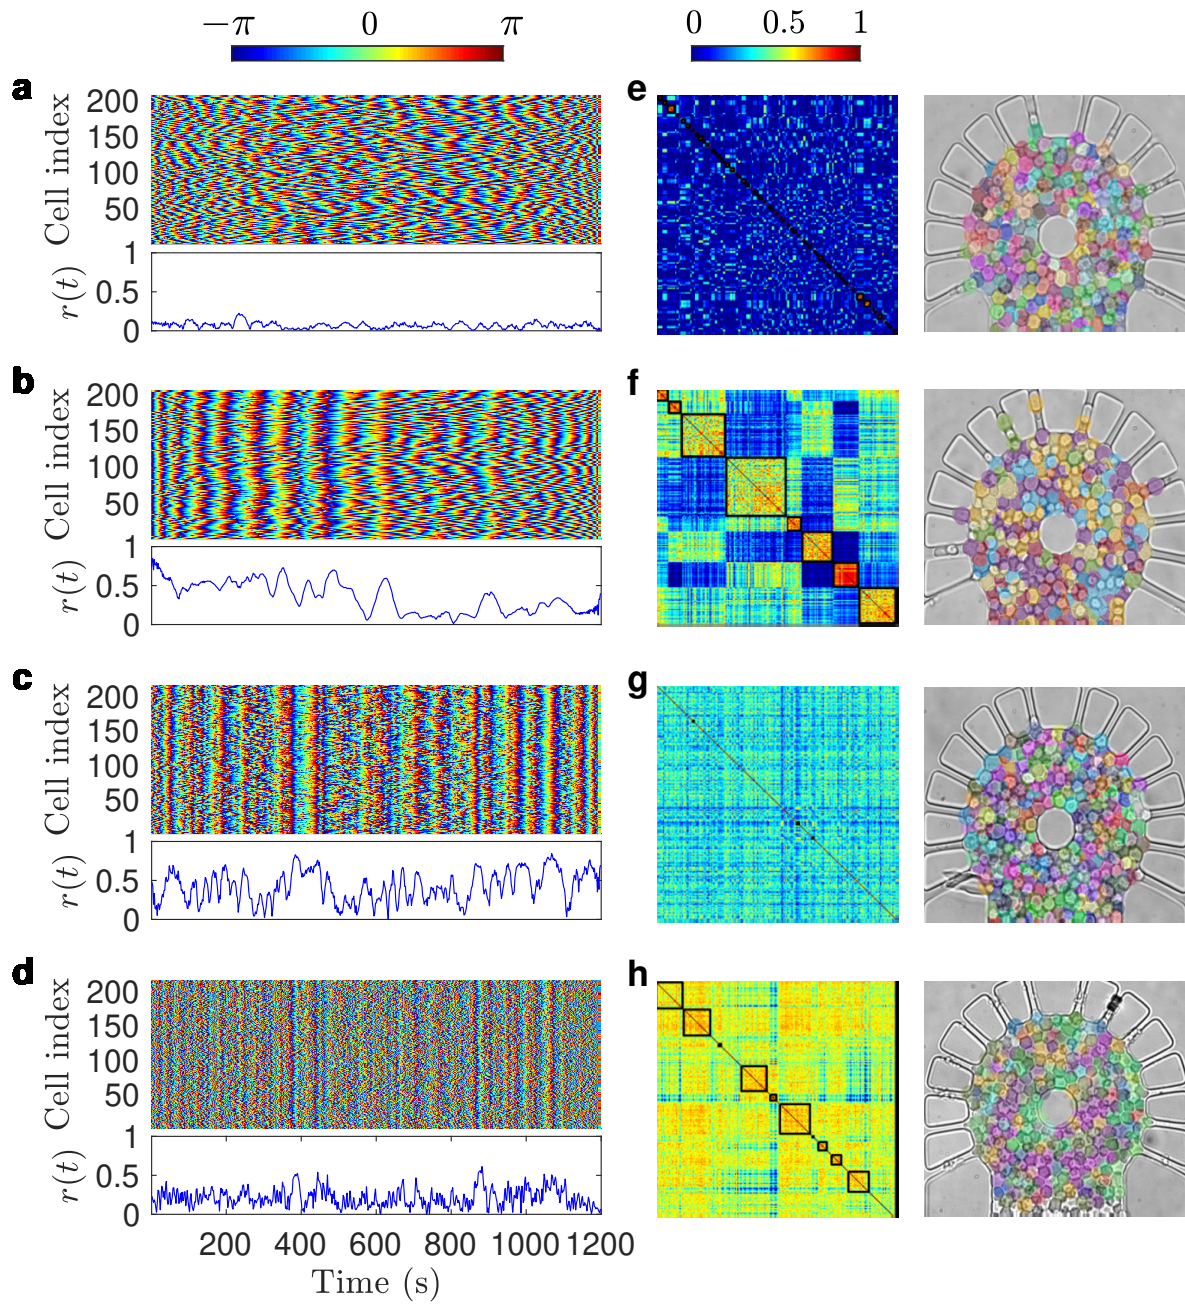

Fig. S7. Community structure repetitions for the 24 mM case.



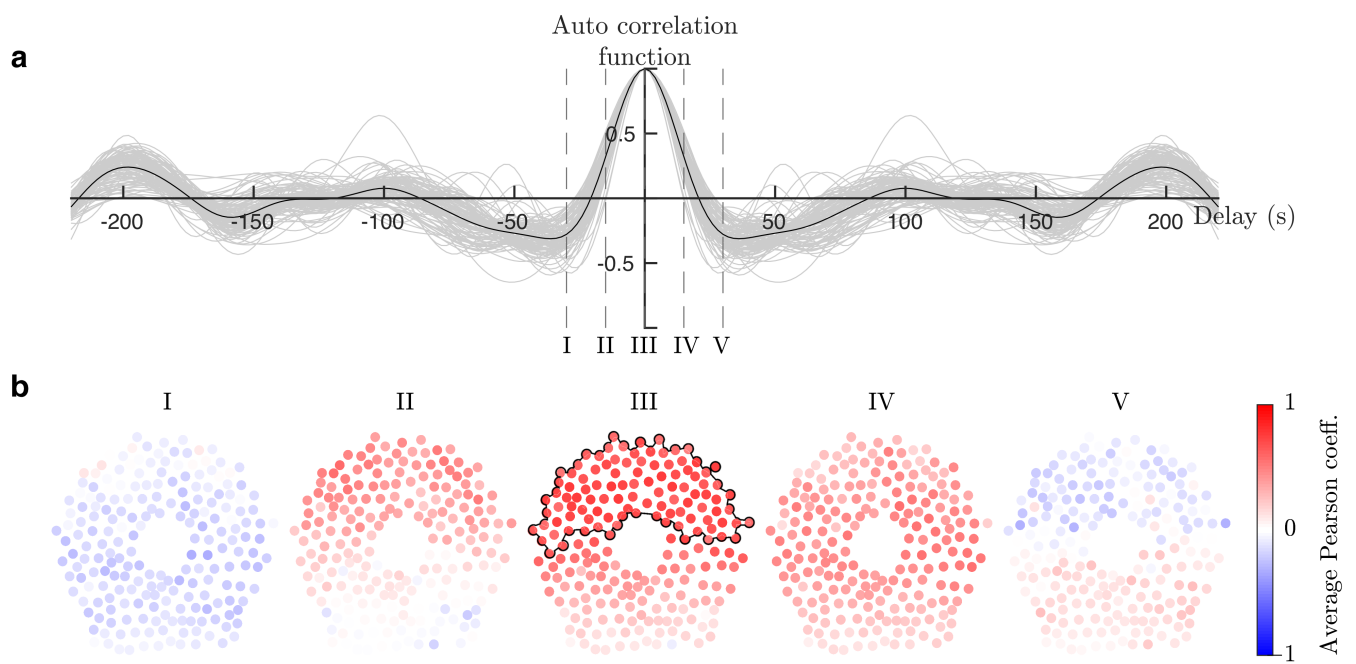

**Fig. S8.** (a) Auto correlation function and (b) Delayed correlations for the top community in the 12 mM case.

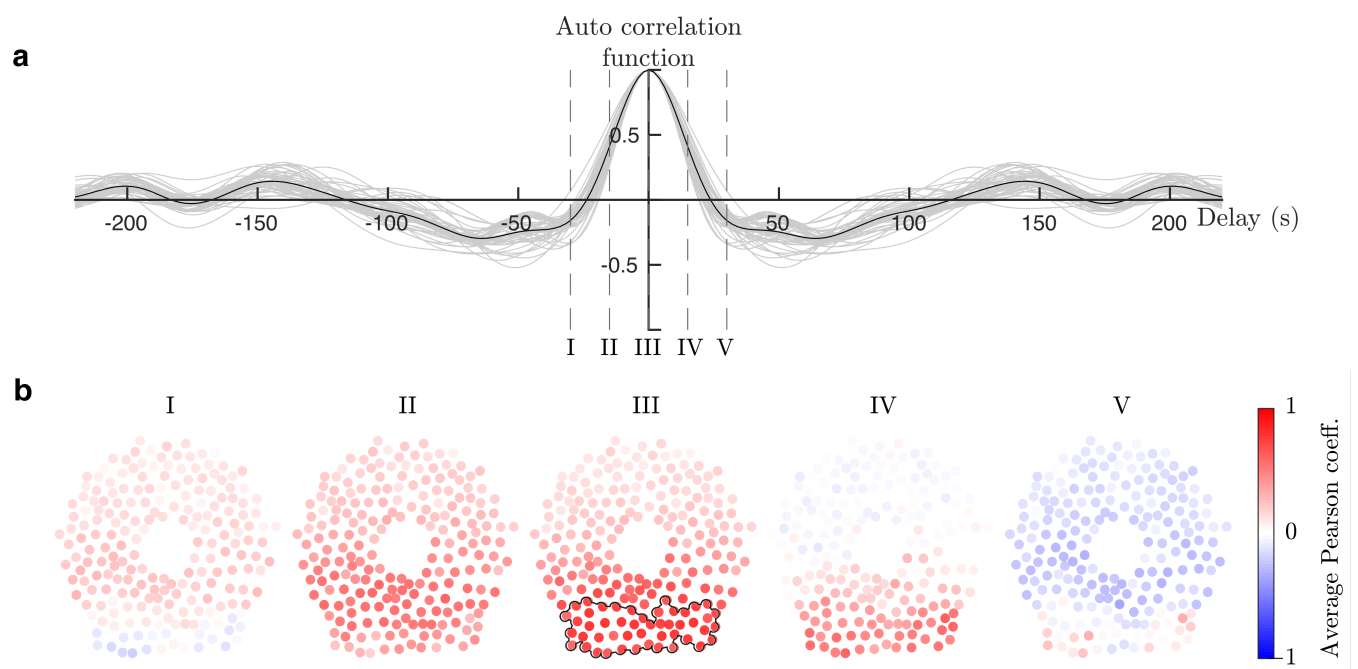

**Fig. S9.** (a) Auto correlation function and (b) Delayed correlations for the bottom community in the 12 mM case.

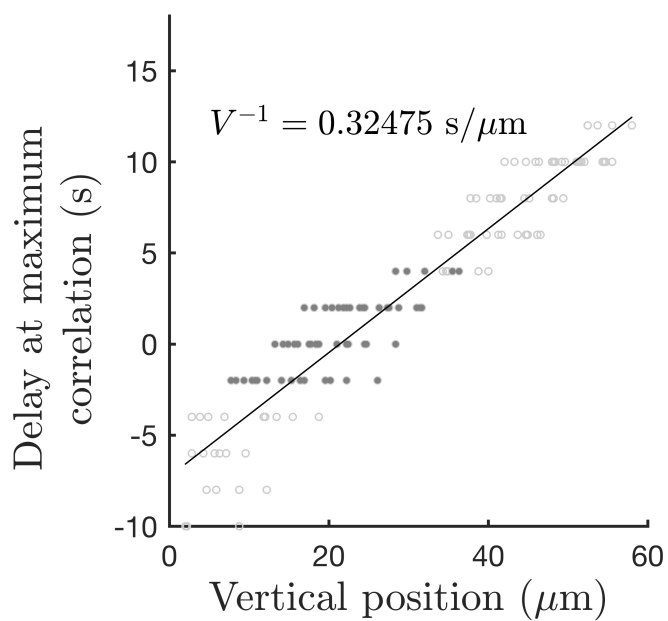

**Fig. S10.** Simulated wave propagation at  $12 \text{ mM CN}^-$ . The delay at maximum correlation as a function of vertical position shows a linear relation that confirms a travelling wave. Due to the fact that the simulated waves displayed a more radial-like propagation, only the region of cells covered exclusively by the vertical propagation are used to calculate the regression.

14 **Movie S1.** The time-dependent NADH autofluorescence signals show the triggering and posterior synchro-  
15 nization of the glycolytic oscillations with a single-cell resolution. Due to the diffusion-based perfusion of  
16  $\text{CN}^-$  and GLC synchronization waves spontaneously appear and travel away from the perfusion channels.

17 **Movie S2.** The simulated time-dependent ACA and ETOH distributions for external and internal concentra-  
18 tions show distinctive responses depending on the  $\text{CN}^-$  external concentrations. The coupling resulting from  
19 the ACA secretion and exchange, reveal an adaptation to travelling waves that indicate an upper threshold  
20 for high  $\text{CN}^-$ . The ETOH secretions display solely chemical diffusion given that the model does not consider  
21 ETOH as a cell-cell coupling agent

22 **Movie S3.** The numerical simulations confirm the fast diffusion of external GLC covering the complete  
23 monolayer. The homogeneous GLC levels indicate that  $\text{CN}^-$  diffusion and consumption control the ACA  
24 coupling responsible for the traveling waves.

25 **Movie S4.** The averaged and normalized delayed correlations between the second community of synchronized  
26 cells (marked with black line in Fig. 4) and every cell present in the chamber (red circles) for a cell array  
27 exposed to 12 mM  $\text{CN}^-$ .
